# Supplementary material
Source: PubMed Central journal article supplement (PMC2935766)
Supplement: 1424-9634-09-009-s001.pdf [file 1424-9634-09-009-s001.pdf]

**Supplementary Figure 1.**

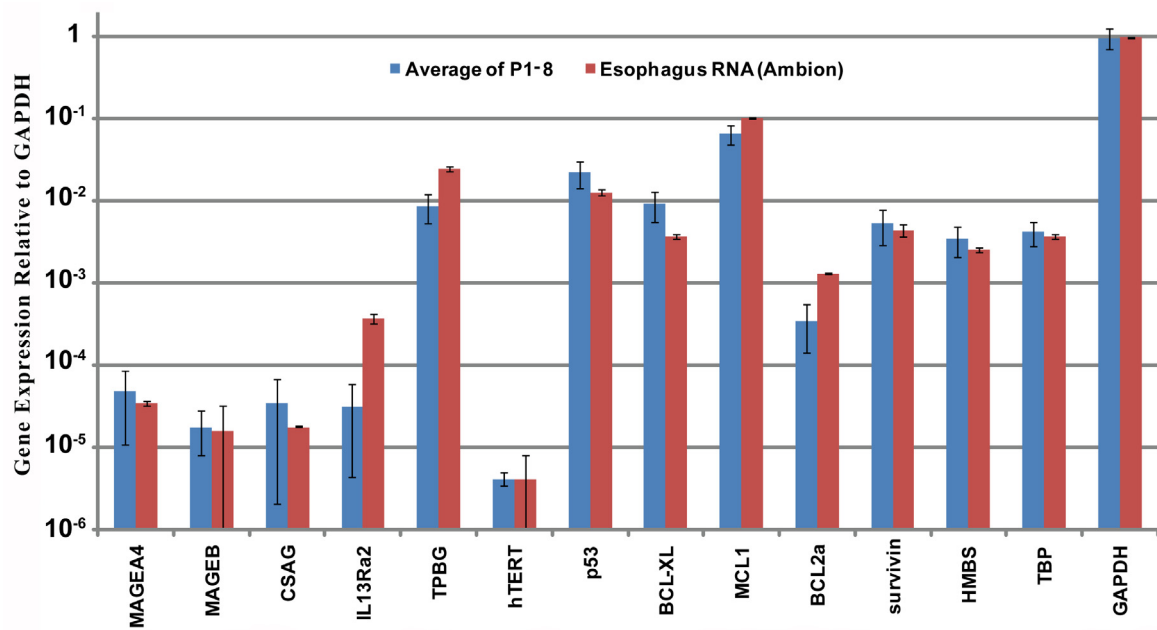

**Relative gene expression in normal esophagus tissue.** Gene expression is shown relative to GAPDH expression. Average of P1-8 indicates the average expression values determined by assaying normal tissue biopsies from patients 1-8, error bars show the standard deviation between patient biopsies. Esophagus RNA was purchased from Ambion (Austin, TX, USA); error bars show the standard deviation between reaction duplicates.
