# Supplementary material
Source: PubMed Central journal article supplement (PMC2935766)
Supplement: 1424-9634-09-009-s002.pdf [file 1424-9634-09-009-s002.pdf]

Supplementary Figure 2.

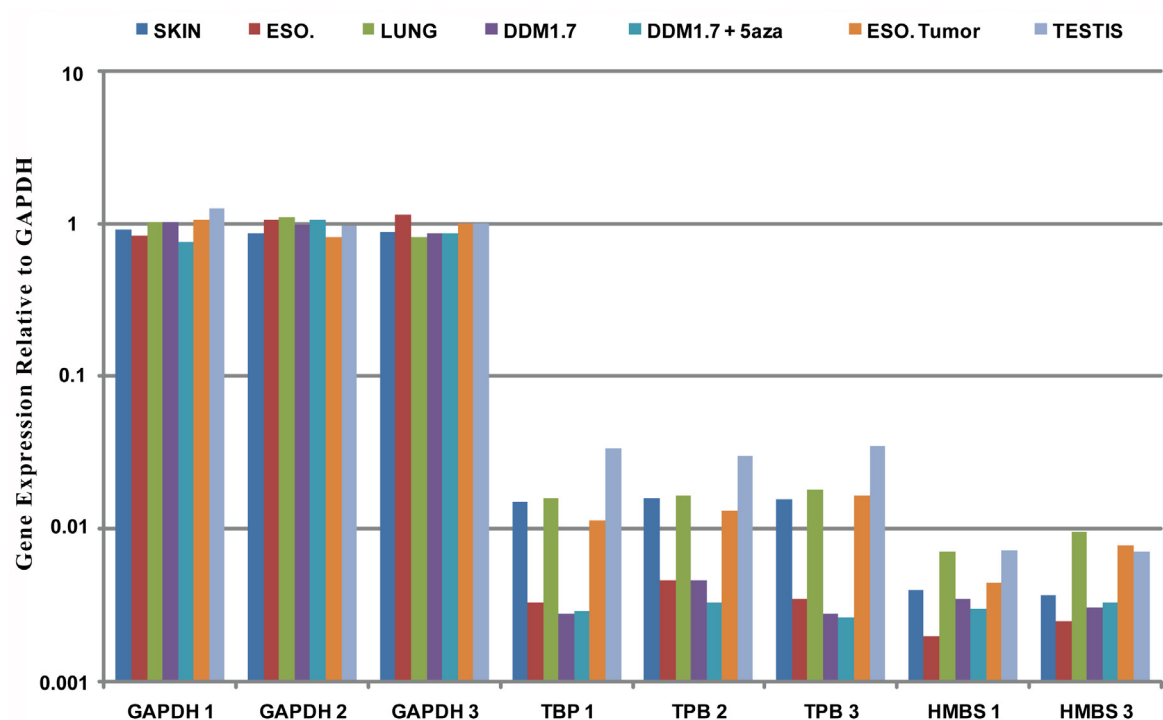

**Housekeeping gene expression relative to GAPDH.** QPCR of 74 genes was performed in three separate reaction runs for each of the samples shown in the above figure. Housekeeping gene expression was measured in each run; GAPDH1 is from run #1, GAPDH2 from run #2 and so on. Gene expression is shown relative to a GAPDH standard curve, therefore GAPDH is not exactly equal to 1.
