# Supplementary material
Source: PubMed Central journal article supplement (PMC2935766)
Supplement: 1424-9634-09-009-s003.pdf [file 1424-9634-09-009-s003.pdf]

**Supplementary Figure 3.**

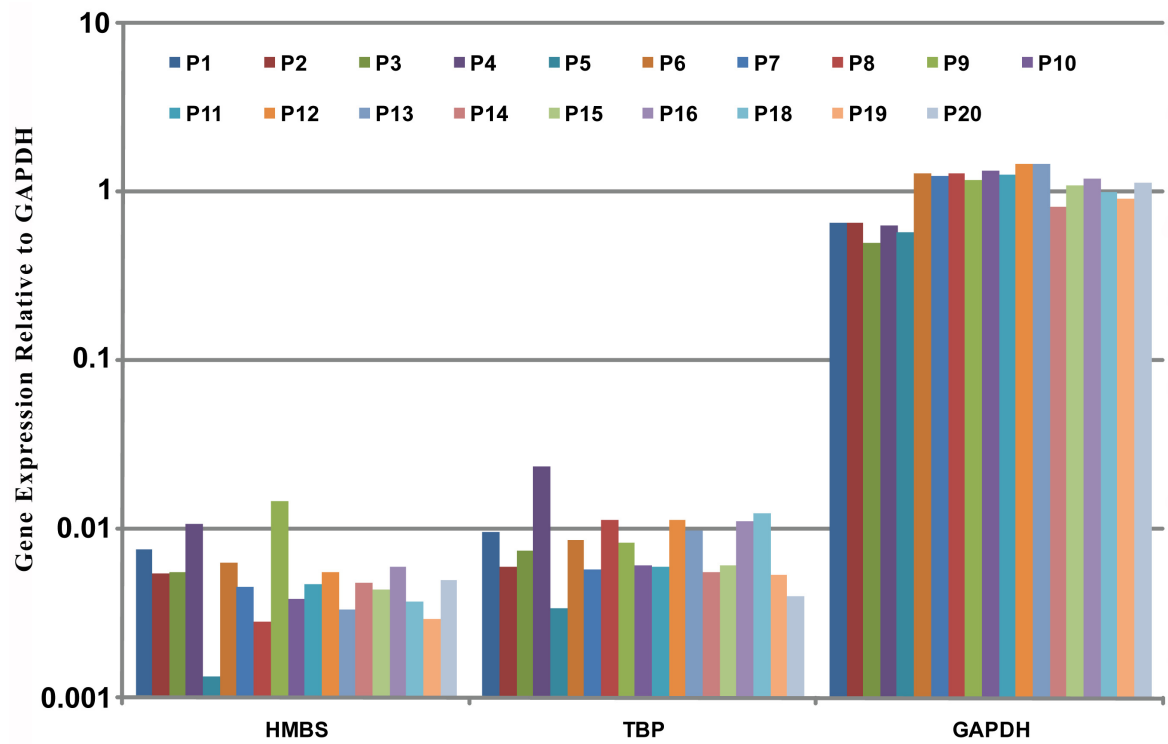

**Housekeeping gene expression in 19 tumor biopsies.** Gene expression is shown relative to GAPDH expression where GAPDH expression is equal to 1. P1 to P20 corresponds to the patient tumor biopsy analyzed.
