# Supplementary material
Source: PubMed Central journal article supplement (PMC2935766)
Supplement: 1424-9634-09-009-s005.pdf [file 1424-9634-09-009-s005.pdf]

**Supplementary Table 2. Genes, amplified transcripts, and QPCR primers used in this study.**

| Gene Name               | NCBI Transcripts Amplified                                                                                                                                                                                                                          | Primers                                                  |
|-------------------------|-----------------------------------------------------------------------------------------------------------------------------------------------------------------------------------------------------------------------------------------------------|----------------------------------------------------------|
| MAGEA1                  | NM_004988.4                                                                                                                                                                                                                                         | AGTAGTAGGTTTCTGTTCTATTGGG<br>TACTTATTCCTACTGCTGTTATTATCC |
| MAGEA2                  | NM_005361.2, NM_175742.1,<br>NM_175743.1, NM_153488.3                                                                                                                                                                                               | GAGGACAGTGTCTTCGCAC<br>GGTTCTCCACCGATCTTTAGTG            |
| MAGEA3                  | NM_005362.3                                                                                                                                                                                                                                         | GCTGAGTGTGTTAGAGGTGTT<br>AGGGGTGGGTAGGAAATGT             |
| MAGEA4                  | NM_001011548.1, NM_002362.4,<br>NM_001011549.1, NM_001011550.1                                                                                                                                                                                      | GCAATGGAGGGCGACAGC<br>CAATCTTGGGTGAGCAGTTCC              |
| MAGEA6                  | NM_005363.2, NM_175868.1                                                                                                                                                                                                                            | GCTGAGTGTGTTAGAGGTGTT<br>CAGGAGTGGGTAGGAAATGC            |
| MAGEA9                  | NM_005365.4, NM_001080790.1                                                                                                                                                                                                                         | GTTCCCTTGCTATTGGGTGATTTG<br>TTCTCTGCTATGTTATCTTGTC       |
| MAGEA10                 | NM_001011543.1, NM_021048.3                                                                                                                                                                                                                         | TCCGTCGTTGCTTCCCTTC<br>TCGGCTCCTTCATTTGATACTTG           |
| MAGEA12                 | NM_005367.4                                                                                                                                                                                                                                         | CTGAGTGTGTTGGAGGCATC<br>GGTGGGTAGGAAATGTGAGGT            |
| MAGEB (1,2,3,4,6,10,18) | NM_173523.2, NM_002365.3,<br>NM_002367.2, NM_182506.2,<br>NM_002363.3, NM_177404.1,<br>NM_177415.1, NM_173699.2,<br>NM_002364.3, NM_001099921.1                                                                                                     | GCAGGTGCCCAACAGTGATCC<br>AGGACTTTCATCTTGCTGGTTTCAGC      |
| MAGEB1                  | NM_002363.3, NM_177404.1,<br>NM_177415.1                                                                                                                                                                                                            | GCTTTGAGAGATGAGGAAGAGAG<br>GGGAGGACCTGCTGAATGG           |
| MAGEB2                  | NM_002364.3                                                                                                                                                                                                                                         | TGCCTTCCCAACCCATTACG<br>AGAATCTGCCTAAGACCTCATTG          |
| MAGEB3                  | NM_002365.3                                                                                                                                                                                                                                         | CCACGCCTAGTGAAGTTGAAG<br>CCTCCAGTAACACCCAGTCC            |
| MAGEB4                  | NM_002367.2                                                                                                                                                                                                                                         | GTGGTTTGTCTTACTCAGTTCAG<br>TCTCCCTCATCTCTTAAAGTCTTC      |
| MAGEB6                  | NM_173523.2                                                                                                                                                                                                                                         | GCCGACAGCAGTAACACC<br>TCTCTCTACCTCATCTATCAAAGC           |
| MAGEB18                 | NM_173699.2                                                                                                                                                                                                                                         | AGAGGCTTTGAGGGATGAGG<br>CACTACTTAGAATGTTGACTGCTC         |
| MAGEC1                  | NM_005462.3                                                                                                                                                                                                                                         | TCTGGGATGTGCTGAGTGG<br>ACGAGGAGGAGAAGAGTTGG              |
| MAGEC2                  | NM_016249.2                                                                                                                                                                                                                                         | GGAGGGAGCACTTCGTCTATG<br>AGGATGGAAGGAACTAGGAACAG         |
| MAGEC3                  | NM_138702.1, NM_177456.2                                                                                                                                                                                                                            | CCCACAACCACTCCTATTTTC<br>GCACTCAACACTTCCCAGATG           |
| GAGE (1,2,3,4,6,8)      | NM_001098411.3, NM_001127212.1,<br>NM_001127200.1, NM_001098405.1,<br>NM_001098407.1, NM_001098409.1,<br>NM_001098406.1, NM_001472.2,<br>NM_001468.3, NM_001040663.1,<br>NM_021123.2, NM_001477.1,<br>NM_012196.1, NM_001474, NM_001476,<br>U_19144 | AAGGGGAACCAGCAACTCAAC<br>GGACCATCTTCACACTCACACC          |
| BAGE (1,2,3,4,5)        | NM_001187.1, NM_182482.2,<br>NM_182481.1, NM_181704.1,<br>NM_182484.1                                                                                                                                                                               | TGGAGGTTGGAGCCTGAAG<br>GCACAAGGATAATGATACATCTGG          |
| SAGE                    | NM_018666.2                                                                                                                                                                                                                                         | GATAGTAATGAATTTGCGGTAGGC<br>GGAGATATTTGTGGTGTATTTGGC     |
| HAGE                    | NM_018665.1                                                                                                                                                                                                                                         | ATGGTGGTGGAAATAGAGATGAAC<br>GAGGCGATGAACGAATGAGG         |
| PAGE (2,5)              | NM_207339.2, NM_001013435.1,<br>NM_130467.3, NM_001015038.1                                                                                                                                                                                         | GAGTCTTCCCAGCCAGTTG<br>AGTTGGTGGTTCCTCTTCTTG             |
| RAGE                    | NM_014226.1                                                                                                                                                                                                                                         | AGAACAGTCCCTAAAGCAAGAG<br>TCTGACCACTCCCGAAAGC            |
| CAGE                    | NM_182699.2                                                                                                                                                                                                                                         | ATCAAGAGCGAGCAGTAGAGG<br>GTCTTCCCTGTCCTCCCAATG           |
| XAGE1A-E                | NM_001097591.1, NM_001097595.1,<br>NM_001097602.1, NM_133431.2,<br>NM_001097603.1                                                                                                                                                                   | GTGAGTGAGAGTGAAGAGGAACC<br>GCCGTGACGAGACAAGAAGG          |
| LAGE (CTAG) (1,2)       | NM_172377.2, NM_020994.2,<br>NM_139250.1, NM_001327.1                                                                                                                                                                                               | GGTCATGCCTCCTCCCCTAG<br>TGTAAGCCGTCCTCCTCCAG             |

|                           |                                                                                                                                                                              |                                                       |
|---------------------------|------------------------------------------------------------------------------------------------------------------------------------------------------------------------------|-------------------------------------------------------|
| LAGE2 (CTAG1/NY-ESO)      | NM_139250.1, NM_001327.1                                                                                                                                                     | CGCCTGCTTGAGTTCTACC<br>CAGTCAGTCGGATAGTCAGTATG        |
| SSX (1,2,3a,4a,5,6,7,8,9) | NM_021015.3, NM_175723.1,<br>NM_173357.2, NM_005636.3,<br>NM_175698.1, NM_005635.2,<br>NM_003147.4, NM_021014.2,<br>NM_001034832.2, NM_173358.2,<br>NM_174962.3, XR_041312.1 | GCCCAAGAAGCCAGCAGAGG<br>GCAGTCTGTGGGTCCAGGC           |
| CSAG(1,2,3)               | NM_153478.1, NM_001102576.1,<br>NM_001080848.2, NM_004909.3,<br>NM_001129826.1, NM_001129828.1                                                                               | CGCTGGTCTGGTGAAGATGTC<br>GAGTGGCTGGATAGTGTGGC         |
| IL-13R $\alpha$ 2         | NM_000640.2                                                                                                                                                                  | ATCATCAGAGAACAAGCCTATCAG<br>GCAGTCACCAAGGTAGTATCATC   |
| hTERT                     | NM_198253.2, NM_198255.2                                                                                                                                                     | GTATGGCTGCGTGGTGAAC<br>GGTGAGACTGGCTCTGATGG           |
| p53                       | NM_000546.4, NM_001126112.1,<br>NM_001126113.1, NM_001126114.1,<br>NM_001126115.1, NM_001126116.1,<br>NM_001126117.1                                                         | CAATAGGTGTGCGTCAGAAGC<br>TACATCTCCCAACATCCCTCAC       |
| Her2/Neu                  | NM_004448.2, NM_001005862.1                                                                                                                                                  | GTGCCAGTGTGAACCAGAAG<br>CCTCAGAAATCCACAAGACTCC        |
| BCL-XL                    | NM_138578.1, NM_001191.2                                                                                                                                                     | CAGGCTGCTGGGATAAAGATG<br>GGACTAGGGTGGTGTGAAC          |
| MCL1                      | NM_021960.3, NM_182763.1                                                                                                                                                     | TTCTGTTTGTCTTACGCTTCTCTC<br>TTGTAGTTGGTCCTAACCCCTCC   |
| BCL2 $\alpha$             | NM_000633.2                                                                                                                                                                  | AGTGTGGTCTCCGAATGTCTG<br>GCCTCTGTTCCTTCCCTCTAC        |
| livin                     | NM_139317.1, NM_022161.2                                                                                                                                                     | CCGTGTCCATCGTCTTTGTG<br>ACAGTCCAGAACAGGCAGAG          |
| survivin                  | NM_001168.2, NM_001012270.1,<br>NM_001012271.1                                                                                                                               | CTAAGCACAAAGCCATTTAAGTC<br>TCACTCTATTCTGTCTCCTCATCC   |
| SCP1/HOM-TES-14           | NM_003176.2                                                                                                                                                                  | ACCGTTGGGCTGTAATTGC<br>TAGGCTCCTAACCTACACTGATTC       |
| SPANXC                    | NM_022661.2                                                                                                                                                                  | GCCGCAGACATTTGAAGAACC<br>TCGTCTCATTACCTCGTTGG         |
| OY-TES-1                  | NM_032489.2                                                                                                                                                                  | TTTCGGGAAGTCGGTCTGTG<br>GAGTCTTGTGGGAGGTGTGC          |
| PLU-1                     | NM_006618.3                                                                                                                                                                  | AGCCCTCACTAACAAAGAAC<br>TTTCCTTAGATTTCTTCCAACG        |
| RHAMM                     | NM_012484.1, NM_012485.1                                                                                                                                                     | TTCGTCTTGTGTTATTGATGTTG<br>AGGTGATAAAGGTGAGCATTAGG    |
| TPTE                      | NM_199261.2, NM_199259.2,<br>NM_199260.2                                                                                                                                     | CGGTACTTGATAACATTACAACAG<br>TCACATCATCATAACAGAGGTAGAC |
| CYP1B1                    | NM_000104.3                                                                                                                                                                  | TGTCAACACAGTCCAGATGTG<br>AAATAAGCCAGGTAACCTCCAAGC     |
| MELK                      | NM_014791.2                                                                                                                                                                  | GGATGAGTGTGGGTGTGATAC<br>GACAGATGGGCTTGATTTAGATTC     |
| BORIS                     | NM_080618.2                                                                                                                                                                  | TTGGTATAGGAGCAAGGTTTAC<br>AGGGAAATACTACTAATCACTGG     |
| DPPA2                     | NM_138815.2                                                                                                                                                                  | GAGAGCAGAAGAGACCAATACAG<br>GCCTCAACAGAAAACGGGAATG     |
| BRDT                      | NM_207189.2, NM_001726.3                                                                                                                                                     | TTAGGCAAACCAGTGAACCATC<br>TTCCGTATGAGTTCTGTGTCC       |
| ADAM2                     | NM_001464.3                                                                                                                                                                  | TTACCTCCAGATTGCTCAGTTC<br>TGCTCATCGCTTGAATAGTCC       |
| TSP50                     | NM_013270.4                                                                                                                                                                  | TGACCAGATGACGCAGACC<br>CCACCCAGGACCAGAACC             |
| SPA17                     | NM_017425.2                                                                                                                                                                  | GGGACACATAGCCAGAGAGG<br>TTCACAACATCAAATCTTCTTCC       |
| MMA                       | XR_040165.1                                                                                                                                                                  | GCCAAGACCGAAAGTGCTG<br>CTAAATATGGAACAAGTGAGAATAAC     |
| HOMTES85                  | NM_016383.3                                                                                                                                                                  | CAAGATGTCCCATTAAGTGTGTTCC<br>TTGGCAGTTAGTTGTTAGATTAGC |
| SP17 (SPA17)              | NM_017425.2                                                                                                                                                                  | ACCAACTTTGATCCAGCAGAATG<br>ACTGATGTCTCTTCTCCTTCC      |
| KM-HN-1                   | NM_152775.2                                                                                                                                                                  | TAATTGTACTGCTAACTGAACTATGC<br>CCTGCCCTCCCTTGTAGAAG    |
| TPBG (5T4)                | NM_006670.3                                                                                                                                                                  | AGAGGACAGACCAAGGACAAC<br>CATTAACAGAACACCCGAGAAAC      |
| D40                       | NM_170589.3, NM_144508.3                                                                                                                                                     | GGTGATGAAGTCTGGATGGTAG<br>AATGGCTAATGTTCTGTGTCAGTG    |

|                  |                                                     |                                                    |
|------------------|-----------------------------------------------------|----------------------------------------------------|
| <b>HCA661</b>    | <b>NM_016521.2</b>                                  | CGGCAGGTTCCAGGTCTAATG<br>GTTGTTGTCTCCTCCTCTTCC     |
| <b>LDHC</b>      | <b>NM_002301.4, NM_017448.3</b>                     | TTCTCAGTATCCCTTGTGTCTTG<br>GCCTGCTATCTTCTGTTCTCC   |
| <b>MORC</b>      | <b>NM_014429.2</b>                                  | CGATATGTGAAGGACTACAGAATC<br>TGCTTGACTGAGTGTGGC     |
| <b>SGY-1</b>     | <b>NM_014419.3</b>                                  | CCTGCTGCTGCTCCTCTC<br>CTGGTGCTCCTGGTCTCC           |
| <b>NXF2</b>      | <b>NM_017809.3, NM_022053.1,<br/>NM_001099686.1</b> | GGTCTGTCTCGCCTTAC<br>AGACCACTCCAGTTTCATCCC         |
| <b>FATE</b>      | <b>NM_033085.2</b>                                  | ATCATCGCCGTGCTGGTG<br>GGGAAAGAGGAAAGAAAGAGGG       |
| <b>LIPI</b>      | <b>NM_198996.2</b>                                  | TGTCCTCGGCTGGTTATC<br>CCTGGCTCTTCAATCATTC          |
| <b>CTAGE</b>     | <b>NM_172241.2</b>                                  | TGCCTTCTTCCAGTGAGAG<br>GAGTGAGATATGTACCCAGTTG      |
| <b>SPO11</b>     | <b>NM_012444.2, NM_198265.1</b>                     | GCTCATCATCTCACAGTTCAG<br>GGCAGGTAAACATAAGGTCTCC    |
| <b>TPX1</b>      | <b>NM_003296.1</b>                                  | GGTACTGTGCTGCTCCATC<br>CTCTCTGCTCCATCCATCTTTAG     |
| <b>NY-SAR-35</b> | <b>NM_152578.1</b>                                  | CAGGATGGCGGAATCTCTAAAG<br>ACAGGTAGTAGGACAGGTAGTAGC |
| <b>FTHL17</b>    | <b>NM_031894.1</b>                                  | AAAGAGACTTGAGCCCAGATG<br>ACACCTTTATTGCTTTGAGAACC   |
| <b>TDRD1</b>     | <b>NM_198795.1</b>                                  | GAATACTGGCAAGGAATACATAGG<br>GAGGCAGACGACAGAGAATG   |
| <b>TDRD6</b>     | <b>NM_001010870.1</b>                               | ATGGTATGGAGGAGATAGTGAAC<br>TTGGTCTGCGTAAGATGCC     |
| <b>TEX15</b>     | <b>NM_031271.3</b>                                  | AGAGAATTGGTTTGGCTGAATC<br>CAGTTCTTTGCTTGACCTTCC    |
| <b>HMBS</b>      | <b>NM_000190.3, NM_001024382.1</b>                  | ACCCTAGAAACCTGCCAGAG<br>CGAATACTCCTGAACTCCAGATGC   |
| <b>TBP</b>       | <b>NM_003194.3</b>                                  | ATGGTGGTGTGTGAGAAGATG<br>GATAGCAGCACGGTATGAGC      |
| <b>GAPDH</b>     | <b>NM_002046.3</b>                                  | AGCTTGTATCAATGGAAATCCC<br>GTGAAGACGCCAGTGGACTC     |

NCBI transcripts amplified were identified using the NCBI primer blast tool. Some reactions amplify multiple transcripts due to the presence of alternatively spliced transcripts, other reactions amplify several related gene family members, these reactions are typically identified because the gene name is followed by several numbers, indicating individual family members, for example, BAGE (1,2,3,4,5). The top QPCR primer is the 5' or forward primer; the bottom primer is the 3' or reverse primer.
