# Supplementary material
Source: PubMed Central journal article supplement (PMC2935766)
Supplement: 1424-9634-09-009-s006.pdf [file 1424-9634-09-009-s006.pdf]

Supplementary Figure 1.

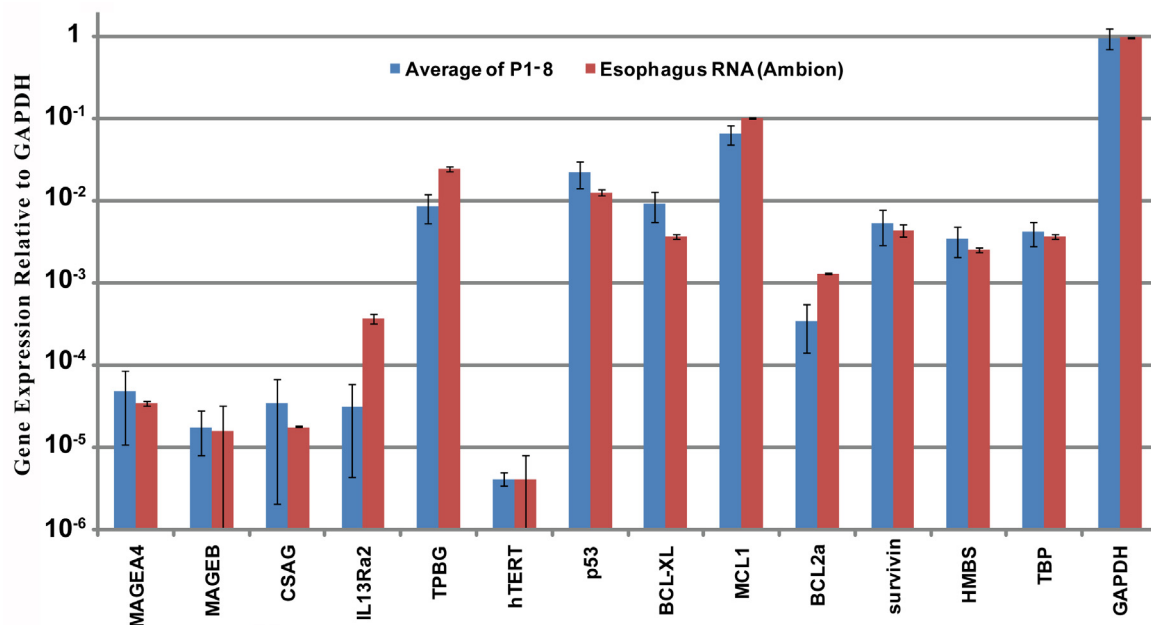

**Relative gene expression in normal esophagus tissue.** Gene expression is shown relative to GAPDH expression. Average of P1-8 indicates the average expression values determined by assaying normal tissue biopsies from patients 1-8, error bars show the standard deviation between patient biopsies. Esophagus RNA was purchased from Ambion (Austin, TX, USA); error bars show the standard deviation between reaction duplicates.

Supplementary Figure 2.

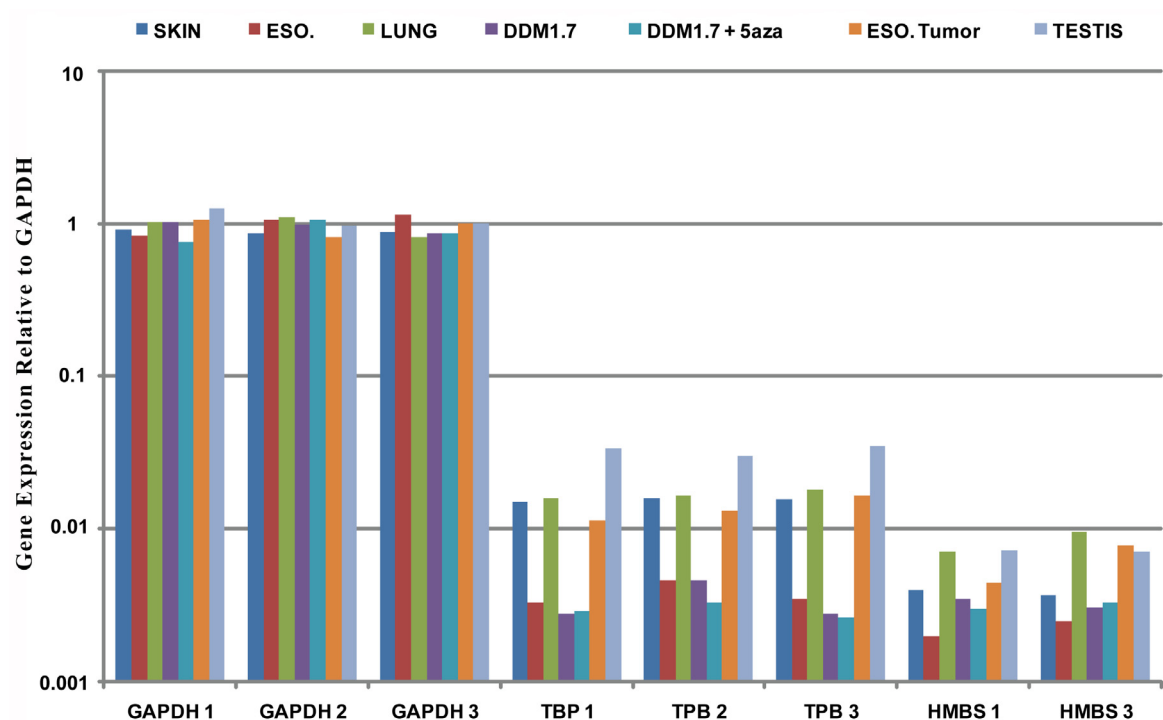

**Housekeeping gene expression relative to GAPDH.** QPCR of 74 genes was performed in three separate reaction runs for each of the samples shown in the above figure. Housekeeping gene expression was measured in each run; GAPDH1 is from run #1, GAPDH2 from run #2 and so on. Gene expression is shown relative to a GAPDH standard curve, therefore GAPDH is not exactly equal to 1.

**Supplementary Figure 3.**

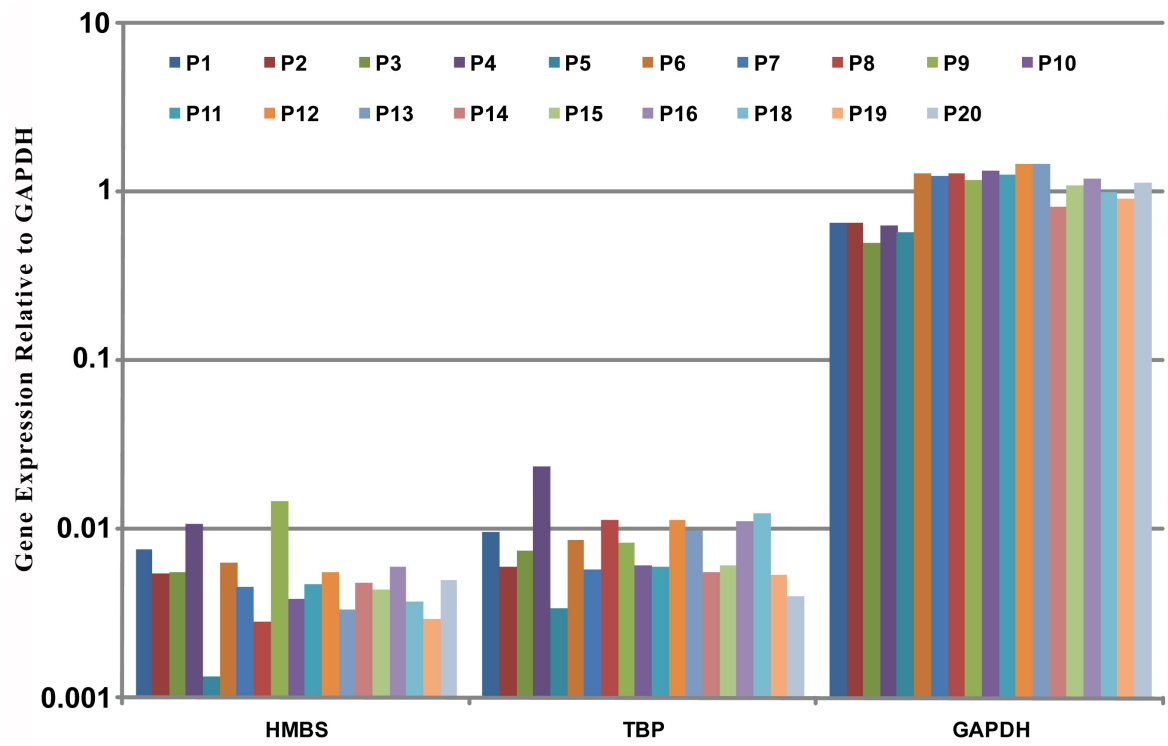

**Housekeeping gene expression in 19 tumor biopsies.** Gene expression is shown relative to GAPDH expression where GAPDH expression is equal to 1. P1 to P20 corresponds to the patient tumor biopsy analyzed.

Supplementary Table 1. Analysis of tumor antigen gene expression by QPCR.

| Gene              | SKIN     | ESO.     | LUNG     | DDM1.7   | DDM1.7<br>+5aza | ESO.<br>Tumor | TESTIS   |
|-------------------|----------|----------|----------|----------|-----------------|---------------|----------|
| MAGEA1 (CT1.1)    | N.P.     | N.P.     | N.P.     | 2.00E-03 | 2.66E-03        | 1.07E-02      | 4.95E-03 |
| MAGEA2 (CT1.2)    | N.P.     | N.P.     | N.P.     | 9.67E-03 | 8.28E-03        | 9.55E-03      | 7.79E-03 |
| MAGEA3 (CT1.3)    | N.P.     | N.P.     | N.P.     | 7.91E-02 | 5.56E-02        | 4.94E-02      | 3.44E-02 |
| MAGEA4 (CT1.4)    | 4.78E-05 | 1.29E-05 | 6.62E-05 | 4.09E-05 | 5.23E-04        | 2.27E-02      | 3.67E-02 |
| MAGEA6 (CT1.6)    | N.P.     | N.P.     | N.P.     | 2.21E-02 | 2.19E-02        | 4.37E-02      | 3.77E-02 |
| MAGEA9 (CT1.9)    | N.P.     | N.P.     | 1.02E-05 | 2.39E-06 | 4.01E-04        | 1.95E-02      | 1.35E-02 |
| MAGEA10 (CT1.10)  | N.P.     | N.P.     | N.P.     | 2.17E-05 | 3.07E-04        | 1.29E-02      | 5.55E-03 |
| MAGEA12 (CT1.12)  | N.P.     | N.P.     | N.P.     | 3.04E-02 | 2.35E-02        | 1.96E-02      | 7.44E-03 |
| MAGEB (CT3)       | 1.57E-05 | 2.86E-06 | 9.17E-06 | 2.05E-03 | 3.91E-03        | 1.55E-02      | 6.99E-02 |
| MAGEB1 (CT3.1)    | N.P.     | N.P.     | N.P.     | 7.19E-06 | 2.94E-04        | 7.12E-05      | 3.85E-02 |
| MAGEB2 (CT3.2)    | 5.12E-06 | N.P.     | N.P.     | 3.72E-03 | 6.45E-03        | 3.17E-02      | 1.01E-01 |
| MAGEB3 (CT3.?)    | N.P.     | N.P.     | N.P.     | N.P.     | 1.71E-05        | 4.31E-05      | 9.93E-03 |
| MAGEB4 (CT3.?)    | N.P.     | N.P.     | N.P.     | N.P.     | N.P.            | N.P.          | 3.30E-03 |
| MAGEB6 (CT3.4)    | N.P.     | N.P.     | N.P.     | 5.41E-06 | 1.72E-04        | 1.30E-04      | 4.42E-03 |
| MAGEB18 (CT3.?)   | N.P.     | N.P.     | N.P.     | N.P.     | 4.25E-05        | N.P.          | 2.57E-03 |
| MAGEC1 (CT7.1)    | N.P.     | N.P.     | N.P.     | N.P.     | 1.30E-03        | 3.99E-03      | 2.58E-02 |
| MAGEC2 (CT10)     | N.P.     | N.P.     | N.P.     | N.P.     | 2.21E-03        | 1.04E-02      | 7.53E-02 |
| MAGEC3 (CT7.2)    | 4.34E-05 | N.P.     | N.P.     | 5.00E-06 | 1.35E-05        | 5.16E-05      | 1.22E-03 |
| GAGE (CT4)        | N.P.     | N.P.     | N.P.     | 1.33E-04 | 1.38E-03        | 1.98E+00      | 7.02E-01 |
| BAGE (CT2)        | N.P.     | N.P.     | N.P.     | 1.00E-04 | 7.53E-04        | 5.01E-04      | 5.69E-03 |
| SAGE (CT14)       | N.P.     | N.P.     | N.P.     | 4.81E-04 | 7.59E-04        | 2.63E-03      | 7.09E-03 |
| HAGE (CT13)       | 9.68E-05 | N.P.     | 1.20E-03 | N.P.     | 2.41E-04        | 2.46E-03      | 1.97E-02 |
| PAGE (CT16)       | 1.10E-04 | 9.40E-06 | 8.68E-05 | 4.35E-05 | 1.59E-03        | 2.89E-02      | 1.33E-01 |
| RAGE              | 1.17E-03 | 1.62E-04 | 1.07E-03 | 2.01E-04 | 5.70E-04        | 1.39E-03      | 1.64E-02 |
| CAGE (CT26)       | N.P.     | N.P.     | N.P.     | 6.08E-06 | 4.46E-05        | 1.34E-04      | 2.99E-03 |
| XAGE1 (CT12)      | N.P.     | N.P.     | 1.02E-04 | N.P.     | 4.60E-05        | 8.49E-04      | 3.94E-03 |
| LAGE 1+2 (CT6)    | 3.68E-05 | 2.59E-06 | 5.43E-03 | 3.45E-05 | 3.30E-03        | 1.92E-01      | 4.68E-02 |
| LAGE2 (CT6.1)     | N.P.     | N.P.     | N.P.     | N.P.     | 1.75E-04        | 2.79E-03      | 1.99E-03 |
| SSX (CT5)         | 2.93E-04 | N.P.     | 5.92E-05 | 2.69E-05 | 2.63E-03        | 3.83E-03      | 3.21E-02 |
| CSAG (CT24.2)     | 7.87E-05 | N.P.     | 3.64E-05 | 4.86E-02 | 4.16E-02        | 4.52E-02      | 1.09E-02 |
| IL-13R $\alpha$ 2 | 5.89E-05 | N.P.     | 8.75E-04 | 8.68E-02 | 1.47E-01        | 6.65E-03      | 1.33E-02 |
| hTERT             | N.P.     | 1.26E-05 | 4.08E-05 | 4.85E-05 | 3.34E-05        | 4.87E-05      | 4.81E-04 |
| p53               | 4.28E-02 | 2.29E-02 | 2.63E-02 | 1.32E-02 | 1.14E-02        | 2.61E-02      | 3.62E-02 |
| Her2/Neu          | 5.20E-02 | 5.20E-02 | 4.58E-02 | 3.43E-03 | 2.36E-03        | 5.61E-02      | 2.38E-02 |
| BCL-XL            | 1.84E-02 | 6.96E-03 | 3.71E-02 | 6.41E-04 | 6.76E-04        | 1.32E-02      | 1.03E-02 |
| MCL1              | 4.20E-01 | 6.42E-02 | 2.13E-01 | 2.41E-02 | 2.30E-02        | 1.03E-01      | 1.33E-01 |
| BCL2 $\alpha$     | 1.66E-02 | 4.01E-04 | 2.64E-03 | 7.74E-04 | 6.29E-04        | 1.32E-03      | 9.78E-03 |
| livin             | N.P.     | N.P.     | 5.48E-06 | N.P.     | 1.57E-05        | 1.88E-04      | 1.09E-05 |
| surviving         | 7.99E-04 | 5.29E-03 | 1.11E-02 | 2.06E-02 | 1.48E-02        | 2.08E-02      | 2.36E-03 |
| SCP1 (CT8)        | 2.27E-05 | N.P.     | N.P.     | N.P.     | 9.80E-07        | 4.79E-05      | 1.69E-02 |
| SPANXC (CT11.3)   | 2.74E-05 | N.P.     | N.P.     | 5.48E-06 | 1.18E-04        | 2.40E-03      | 4.43E-04 |
| OY-TES-1 (CT23)   | 3.68E-04 | 1.83E-05 | 1.04E-03 | 6.75E-06 | 1.53E-05        | 2.10E-04      | 1.25E-03 |
| PLU-1 (CT31)      | 1.28E-02 | 3.72E-03 | 7.79E-03 | 1.60E-03 | 1.31E-03        | 4.46E-03      | 1.97E-02 |
| RHAMM             | 9.40E-05 | 8.86E-04 | 1.65E-03 | 3.89E-03 | 2.38E-03        | 1.16E-03      | 1.17E-03 |
| TPTE (CT44)       | 6.87E-06 | N.P.     | N.P.     | 1.15E-04 | 8.77E-05        | 5.61E-04      | 3.43E-02 |
| CYP1B1            | 1.06E-01 | 4.51E-04 | 2.51E-01 | 1.78E-05 | 3.47E-04        | 8.85E-03      | 1.07E-01 |
| MELK              | 8.50E-04 | 5.48E-03 | 8.66E-03 | 1.51E-02 | 1.30E-02        | 1.91E-02      | 2.23E-02 |
| BORIS (CT27)      | 1.65E-05 | N.P.     | 1.61E-05 | 6.77E-05 | 2.15E-04        | 1.11E-02      | 7.30E-03 |
| DPPA2             | 2.71E-06 | N.P.     | N.P.     | 1.52E-05 | 1.80E-04        | 3.48E-04      | 8.97E-03 |
| BRDT (CT9)        | N.P.     | N.P.     | 3.77E-06 | N.P.     | 1.25E-05        | 1.15E-04      | 8.71E-04 |
| ADAM2 (CT15)      | N.P.     | N.P.     | N.P.     | N.P.     | N.P.            | N.P.          | 4.89E-05 |
| TSP50 (CT20)      | 3.23E-04 | 1.18E-05 | 6.48E-05 | N.P.     | 5.72E-06        | 2.45E-03      | 5.58E-03 |
| SP17 (#1) (CT22)  | 8.39E-04 | 2.16E-03 | 1.68E-02 | 7.44E-04 | 8.52E-04        | 5.26E-03      | 1.79E-02 |
| SP17 (#2) (CT22)  | N.P.     | N.P.     | N.P.     | N.P.     | 1.70E-06        | 3.22E-03      | 2.00E-03 |
| MMA (CT25)        | N.P.     | N.P.     | N.P.     | N.P.     | 2.68E-04        | N.P.          | 9.30E-03 |
| HOM-TES-85 (CT28) | 7.71E-04 | 2.52E-03 | 1.65E-02 | 7.75E-04 | 8.65E-04        | 4.76E-03      | 1.85E-02 |
| KM-HN-1           | 2.33E-04 | 8.04E-05 | 4.31E-04 | 5.38E-06 | 8.22E-06        | 9.91E-05      | 2.39E-03 |
| TPBG (5T4)        | 4.95E-02 | 4.99E-03 | 1.51E-02 | 6.95E-02 | 7.92E-03        | 1.86E-02      | 2.14E-02 |
| D40 (CT29)        | 2.00E-05 | 5.60E-05 | 4.85E-04 | 1.68E-04 | 1.55E-04        | 1.82E-04      | 2.03E-03 |
| HCA661 (CT30)     | 8.20E-05 | N.P.     | N.P.     | 6.26E-06 | 2.46E-04        | N.P.          | 8.55E-03 |
| LDHC (CT32)       | 3.66E-04 | 2.71E-06 | 2.05E-04 | 9.93E-04 | 9.96E-04        | 1.73E-03      | 1.44E-02 |
| MORC (CT33)       | N.P.     | N.P.     | 1.28E-04 | 9.03E-07 | 4.76E-06        | N.P.          | 2.90E-02 |
| SGY-1 (CT34)      | 4.05E-04 | 2.94E-05 | 5.23E-04 | 1.80E-05 | 4.90E-05        | 6.88E-04      | 3.42E-03 |
| NXF2 (CT39)       | N.P.     | N.P.     | 3.16E-04 | 3.11E-06 | 8.81E-05        | 2.09E-02      | 4.61E-02 |
| FATE (CT43)       | 1.44E-05 | N.P.     | 7.20E-05 | N.P.     | N.P.            | 7.97E-05      | 3.57E-01 |
| LIP1 (CT17)       | N.P.     | N.P.     | N.P.     | N.P.     | N.P.            | N.P.          | 5.93E-03 |
| CTAGE (CT21)      | N.P.     | N.P.     | N.P.     | N.P.     | 1.63E-06        | N.P.          | 5.46E-04 |
| SPO11 (CT35)      | N.P.     | N.P.     | N.P.     | N.P.     | N.P.            | N.P.          | 5.48E-03 |
| TPX1 (CT36)       | N.P.     | 2.46E-04 | 7.84E-04 | N.P.     | 1.66E-06        | 5.23E-04      | 9.93E-04 |
| NY-SAR-35 (CT37)  | N.P.     | N.P.     | N.P.     | N.P.     | 1.84E-04        | N.P.          | 1.33E-02 |
| FTHL17 (CT38)     | N.P.     | N.P.     | N.P.     | N.P.     | 2.35E-05        | N.P.          | 1.96E-03 |
| TDRD1 (CT41.1)    | 3.81E-05 | 7.50E-06 | 9.78E-05 | N.P.     | 1.86E-05        | N.P.          | 5.79E-03 |
| TDRD6 (CT41.2)    | 3.77E-04 | 3.64E-06 | 2.19E-04 | 7.58E-07 | 4.03E-06        | 1.36E-05      | 7.23E-03 |
| TEX15 (CT42)      | N.P.     | 2.01E-05 | 6.95E-05 | 3.46E-05 | 1.32E-04        | N.P.          | 4.32E-02 |

Gene expression is shown relative to GAPDH expression; GAPDH expression is equal to 1. Cancer/testis genes are indicated by a CT identification number in parentheses following the gene name, for example MAGE-A1 (CT1.1). Samples analyzed: SKIN = normal human skin, ESO. = normal human esophagus, from P04 (Figure 1), LUNG = normal human lung, DDM1.7 = melanoma cell line used to generate tumor lysate for MelCancerVac®, DDM1.7+5aza = DDM1.7 cells treated with 5-aza-CdR for 72 hours, ESO. Tumor = squamous cell carcinoma of esophagus P04 (Figure 1), TESTIS = normal human testis.

**Supplementary Table 2. Genes, amplified transcripts, and QPCR primers used in this study.**

| Gene Name               | NCBI Transcripts Amplified                                                                                                                                                                                                                          | Primers                                               |
|-------------------------|-----------------------------------------------------------------------------------------------------------------------------------------------------------------------------------------------------------------------------------------------------|-------------------------------------------------------|
| MAGEA1                  | NM_004988.4                                                                                                                                                                                                                                         | AGTAGTAGGTTTCTGTTCTATTGGG<br>TACTTATTCCTGCTGTTATTATCC |
| MAGEA2                  | NM_005361.2, NM_175742.1,<br>NM_175743.1, NM_153488.3                                                                                                                                                                                               | GAGGACAGTGTCTTCGCAC<br>GGTTCTCCACCGATCTTTAGTG         |
| MAGEA3                  | NM_005362.3                                                                                                                                                                                                                                         | GCTGAGTGTGTTAGAGGTGTT<br>AGGGGTGGGTAGGAAATGT          |
| MAGEA4                  | NM_001011548.1, NM_002362.4,<br>NM_001011549.1, NM_001011550.1                                                                                                                                                                                      | GCAATGGAGGGCGACAGC<br>CAATCTTGGGTGAGCAGTTCC           |
| MAGEA6                  | NM_005363.2, NM_175868.1                                                                                                                                                                                                                            | GCTGAGTGTGTTAGAGGTGTT<br>CAGGAGTGGGTAGGAAATGC         |
| MAGEA9                  | NM_005365.4, NM_001080790.1                                                                                                                                                                                                                         | GTTCCCTGTCTATTGGGTGATTTG<br>TTCTCTGCTATGTTATCTTGTC    |
| MAGEA10                 | NM_001011543.1, NM_021048.3                                                                                                                                                                                                                         | TCCGTCGTTGCTTCCCTTC<br>TCGGCTCCTTCATTTGATACTTG        |
| MAGEA12                 | NM_005367.4                                                                                                                                                                                                                                         | CTGAGTGTGTTGGAGGCATC<br>GGTGGGTAGGAAATGTGAGGT         |
| MAGEB (1,2,3,4,6,10,18) | NM_173523.2, NM_002365.3,<br>NM_002367.2, NM_182506.2,<br>NM_002363.3, NM_177404.1,<br>NM_177415.1, NM_173699.2,<br>NM_002364.3, NM_001099921.1                                                                                                     | GCAGGTGCCCAACAGTGATCC<br>AGGACTTTCATCTTGCTGGTTTCAGC   |
| MAGEB1                  | NM_002363.3, NM_177404.1,<br>NM_177415.1                                                                                                                                                                                                            | GCTTTGAGAGATGAGGAAGAGAG<br>GGGAGGACCTGCTGAATGG        |
| MAGEB2                  | NM_002364.3                                                                                                                                                                                                                                         | TGCCTTCCAACCCATTACG<br>AGAATCTGCCTAAGACCTCATTG        |
| MAGEB3                  | NM_002365.3                                                                                                                                                                                                                                         | CCACGCCTAGTGAAGTTGAAG<br>CCTCCAGTAACACCCAGTCC         |
| MAGEB4                  | NM_002367.2                                                                                                                                                                                                                                         | GTGGTTTGTCTTACTCAGTTCAG<br>TCTCCCTCATCTCTTAAAGTCTTC   |
| MAGEB6                  | NM_173523.2                                                                                                                                                                                                                                         | GCCGACAGCAGTAACACC<br>TCTCTACTCTCATCTATCAAAGC         |
| MAGEB18                 | NM_173699.2                                                                                                                                                                                                                                         | AGAGGCTTTGAGGGATGAGG<br>CACTACTTAGAATGTTGACTGCTC      |
| MAGEC1                  | NM_005462.3                                                                                                                                                                                                                                         | TCTGGGATGTGCTGAGTGG<br>ACGAGGAGGAGAAGAGTTGG           |
| MAGEC2                  | NM_016249.2                                                                                                                                                                                                                                         | GGAGGGAGCACTTCGTCTATG<br>AGGATGGAAGGAACTAGGAACAG      |
| MAGEC3                  | NM_138702.1, NM_177456.2                                                                                                                                                                                                                            | CCCACAACCACTCCTATTTTC<br>GCACTCAACACTTCCCAGATG        |
| GAGE (1,2,3,4,6,8)      | NM_001098411.3, NM_001127212.1,<br>NM_001127200.1, NM_001098405.1,<br>NM_001098407.1, NM_001098409.1,<br>NM_001098406.1, NM_001472.2,<br>NM_001468.3, NM_001040663.1,<br>NM_021123.2, NM_001477.1,<br>NM_012196.1, NM_001474, NM_001476,<br>U_19144 | AAGGGGAACCAGCAACTCAAC<br>GGACCATCTTCACTCAACACC        |
| BAGE (1,2,3,4,5)        | NM_001187.1, NM_182482.2,<br>NM_182481.1, NM_181704.1,<br>NM_182484.1                                                                                                                                                                               | TGGAGGTTGGAGCCTGAAG<br>GCACAAGGATAATGATACATCTGG       |
| SAGE                    | NM_018666.2                                                                                                                                                                                                                                         | GATAGTAATGAATTTGCGGTAGGC<br>GGAGATATTTGTGGTGTATTTGGC  |
| HAGE                    | NM_018665.1                                                                                                                                                                                                                                         | ATGGTGGTGGAAATAGAGATGAAC<br>GAGGCGATGAAGTGAATGAGG     |
| PAGE (2,5)              | NM_207339.2, NM_001013435.1,<br>NM_130467.3, NM_001015038.1                                                                                                                                                                                         | GAGTCTTCCCAGCCAGTTG<br>AGTTGGTGGTTCCTCTTCTTG          |
| RAGE                    | NM_014226.1                                                                                                                                                                                                                                         | AGAACAGTCCCTAAAGCAAGAG<br>TCTGACCACTCCCGAAAGC         |
| CAGE                    | NM_182699.2                                                                                                                                                                                                                                         | ATCAAGAGCGAGCAGTAGAGG<br>GTCTTCCCTGTCCTCCCAATG        |
| XAGE1A-E                | NM_001097591.1, NM_001097595.1,<br>NM_001097602.1, NM_133431.2,<br>NM_001097603.1                                                                                                                                                                   | GTGAGTGAGAGTGAAGAGGAACC<br>GCCGTGACGAGACAAGAAGG       |
| LAGE (CTAG) (1,2)       | NM_172377.2, NM_020994.2,<br>NM_139250.1, NM_001327.1                                                                                                                                                                                               | GGTCATGCCTCCTCCCCTAG<br>TGTAAGCCGTCTCCTCCAG           |

|                           |                                                                                                                                                                              |                                                       |
|---------------------------|------------------------------------------------------------------------------------------------------------------------------------------------------------------------------|-------------------------------------------------------|
| LAGE2 (CTAG1/NY-ESO)      | NM_139250.1, NM_001327.1                                                                                                                                                     | CGCCTGCTTGAGTTCTACC<br>CAGTCAGTCGGATAGTCAGTATG        |
| SSX (1,2,3a,4a,5,6,7,8,9) | NM_021015.3, NM_175723.1,<br>NM_173357.2, NM_005636.3,<br>NM_175698.1, NM_005635.2,<br>NM_003147.4, NM_021014.2,<br>NM_001034832.2, NM_173358.2,<br>NM_174962.3, XR_041312.1 | GCCCAAGAAGCCAGCAGAGG<br>GCAGTCTGTGGGTCCAGGC           |
| CSAG(1,2,3)               | NM_153478.1, NM_001102576.1,<br>NM_001080848.2, NM_004909.3,<br>NM_001129826.1, NM_001129828.1                                                                               | CGCTGGTCTGGTGAAGATGTC<br>GAGTGGCTGGATAGTGTGGC         |
| IL-13R $\alpha$ 2         | NM_000640.2                                                                                                                                                                  | ATCATCAGAGAACAAGCCTATCAG<br>GCAGTCACCAAGGTAGTATCATC   |
| hTERT                     | NM_198253.2, NM_198255.2                                                                                                                                                     | GTATGGCTGCGTGGTGAAC<br>GGTGAGACTGGCTCTGATGG           |
| p53                       | NM_000546.4, NM_001126112.1,<br>NM_001126113.1, NM_001126114.1,<br>NM_001126115.1, NM_001126116.1,<br>NM_001126117.1                                                         | CAATAGGTGTGCGTCAGAAGC<br>TACATCTCCCAACATCCCTCAC       |
| Her2/Neu                  | NM_004448.2, NM_001005862.1                                                                                                                                                  | GTGCCAGTGTGAACCAGAAG<br>CCTCAGAAATCCACAAGACTCC        |
| BCL-XL                    | NM_138578.1, NM_001191.2                                                                                                                                                     | CAGGCTGCTGGGATAAAGATG<br>GGACTAGGGTGGTGTGAAC          |
| MCL1                      | NM_021960.3, NM_182763.1                                                                                                                                                     | TTCTGTTTGTCTTACGCTTCTCTC<br>TTGTAGTTGGTCCTAACCCCTCC   |
| BCL2 $\alpha$             | NM_000633.2                                                                                                                                                                  | AGTGTGGTCTCCGAATGTCTG<br>GCCTCTGTTCCTTCCCTCTAC        |
| livin                     | NM_139317.1, NM_022161.2                                                                                                                                                     | CCGTGTCCATCGTCTTTGTG<br>ACAGTCCAGAACAGGCAGAG          |
| survivin                  | NM_001168.2, NM_001012270.1,<br>NM_001012271.1                                                                                                                               | CTAAGCACAAAGCCATTTAAGTC<br>TCACTCTATTCTGTCTCCTCATCC   |
| SCP1/HOM-TES-14           | NM_003176.2                                                                                                                                                                  | ACCGTTGGGCTGTAATTGC<br>TAGGCTCCTAACCTACACTGATTC       |
| SPANXC                    | NM_022661.2                                                                                                                                                                  | GCCGCAGACATTTGAAGAACC<br>TCGTCTCATTACCTCGTTGG         |
| OY-TES-1                  | NM_032489.2                                                                                                                                                                  | TTTCGGGAAGTCGGTCTGTG<br>GAGTCTTGTGGGAGGTGTGC          |
| PLU-1                     | NM_006618.3                                                                                                                                                                  | AGCCCTCACTAACAAAGAAC<br>TTTCCTTAGATTTCTTCCAACG        |
| RHAMM                     | NM_012484.1, NM_012485.1                                                                                                                                                     | TTCGTCTTGTGTTATTGATGTTG<br>AGGTGATAAAGGTGAGCATTAGG    |
| TPTE                      | NM_199261.2, NM_199259.2,<br>NM_199260.2                                                                                                                                     | CGGTACTTGATAACATTACAACAG<br>TCACATCATCATAACAGAGGTAGAC |
| CYP1B1                    | NM_000104.3                                                                                                                                                                  | TGTC AACAGGTCCAGATGTG<br>AAATAAGCCAGGTAACCTCCAAGC     |
| MELK                      | NM_014791.2                                                                                                                                                                  | GGATGAGTGTGGTGTGATAC<br>GACAGATGGGCTTGATTTAGATTC      |
| BORIS                     | NM_080618.2                                                                                                                                                                  | TTGGTATAGGAGCAAGGTTTAC<br>AGGGAAATACTACTAATCACTGG     |
| DPPA2                     | NM_138815.2                                                                                                                                                                  | GAGAGCAGAAGAGACCAATACAG<br>GCCTCAACAGAAACGGGAATG      |
| BRDT                      | NM_207189.2, NM_001726.3                                                                                                                                                     | TTAGGCAAACAGTGAACCATC<br>TTCGGTATGAGTTCTGTGTCC        |
| ADAM2                     | NM_001464.3                                                                                                                                                                  | TTACCTCCAGATTGCTCAGTTC<br>TGCTCATCGCTTGAATAGTCC       |
| TSP50                     | NM_013270.4                                                                                                                                                                  | TGACCAGATGACGCAGACC<br>CCACCCAGGACCAGAACC             |
| SPA17                     | NM_017425.2                                                                                                                                                                  | GGGACACATAGCCAGAGAGG<br>TTCACAACATCAAATCTTCTTCC       |
| MMA                       | XR_040165.1                                                                                                                                                                  | GCCAAGACCGAAAGTGCTG<br>CTAAATATGGAACAAGTGAGAATAAC     |
| HOMTES85                  | NM_016383.3                                                                                                                                                                  | CAAGATGTCCCATTAAGTGTGTTCC<br>TTGGCAGTTAGTTGTTAGATTAGC |
| SP17 (SPA17)              | NM_017425.2                                                                                                                                                                  | ACCAACTTTGATCCAGCAGAATG<br>ACTGATGTCTCTTCTCCTTCC      |
| KM-HN-1                   | NM_152775.2                                                                                                                                                                  | TAATTGTAAGTCTAAGTGAATGTC<br>CCTGCCCTCCCTTGTAGAG       |
| TPBG (5T4)                | NM_006670.3                                                                                                                                                                  | AGAGGACAGACCAAGGACAAC<br>CATTAACAGAACACCCGAGAAAC      |
| D40                       | NM_170589.3, NM_144508.3                                                                                                                                                     | GGTGATGAAGTCTGGATGGTAG<br>AATGGCTAATGTTCTGTGTCAGTG    |

|                  |                                                     |                                                    |
|------------------|-----------------------------------------------------|----------------------------------------------------|
| <b>HCA661</b>    | <b>NM_016521.2</b>                                  | CGGCAGGTTCCAGGTCTAATG<br>GTTGTTGTCTCCTCCTCTTCC     |
| <b>LDHC</b>      | <b>NM_002301.4, NM_017448.3</b>                     | TTCTCAGTATCCCTTGTGTCTTG<br>GCCTGCTATCTTCTGTCTTCC   |
| <b>MORC</b>      | <b>NM_014429.2</b>                                  | CGATATGTGAAGGACTACAGAATC<br>TGCTTGACTGAGTGTGGC     |
| <b>SGY-1</b>     | <b>NM_014419.3</b>                                  | CCTGCTGCTGCTCCTCTC<br>CTGGTGCTCCTGGTCTCC           |
| <b>NXF2</b>      | <b>NM_017809.3, NM_022053.1,<br/>NM_001099686.1</b> | GGTCTGTCTCGCCTTAC<br>AGACCACTCCAGTTTCATCCC         |
| <b>FATE</b>      | <b>NM_033085.2</b>                                  | ATCATCGCCGTGCTGGTG<br>GGGAAAGAGGAAAGAAAGAGGG       |
| <b>LIPI</b>      | <b>NM_198996.2</b>                                  | TGTCCTCGGCTGGTTATC<br>CCTGGCTCTTCAATCATTCC         |
| <b>CTAGE</b>     | <b>NM_172241.2</b>                                  | TGCCTTCTTCCAGTGAGAG<br>GAGTGAGATATGTACCCAGTTG      |
| <b>SPO11</b>     | <b>NM_012444.2, NM_198265.1</b>                     | GCTCATCATCTCACAGTTCAG<br>GGCAGGTAAACATAAGGTCTCC    |
| <b>TPX1</b>      | <b>NM_003296.1</b>                                  | GGTACTGTGCTGCTTCCATC<br>CTCTCTGCTCCATCCATCTTTAG    |
| <b>NY-SAR-35</b> | <b>NM_152578.1</b>                                  | CAGGATGGCGGAATCTCTAAAG<br>ACAGGTAGTAGGACAGGTAGTAGC |
| <b>FTHL17</b>    | <b>NM_031894.1</b>                                  | AAAGAGACTTGAGCCAGATG<br>ACACCTTTATTGCTTTGAGAACC    |
| <b>TDRD1</b>     | <b>NM_198795.1</b>                                  | GAATACTGGCAAGGAATACATAGG<br>GAGGCAGACGACAGAGAATG   |
| <b>TDRD6</b>     | <b>NM_001010870.1</b>                               | ATGGTATGGAGGAGATAGTGAAC<br>TTGGTCTGCGTAAGATGCC     |
| <b>TEX15</b>     | <b>NM_031271.3</b>                                  | AGAGAATTGGTTTGGCTGAATC<br>CAGTTCTTTGCTTGACCTTCC    |
| <b>HMBS</b>      | <b>NM_000190.3, NM_001024382.1</b>                  | ACCCTAGAAACCTGCCAGAG<br>CGAATACTCCTGAATCCAGATGC    |
| <b>TBP</b>       | <b>NM_003194.3</b>                                  | ATGGTGGTGTGTGAGAAGATG<br>GATAGCAGCACGGTATGAGC      |
| <b>GAPDH</b>     | <b>NM_002046.3</b>                                  | AGCTTGTATCAATGGAAATCCC<br>GTGAAGACGCCAGTGGACTC     |

NCBI transcripts amplified were identified using the NCBI primer blast tool. Some reactions amplify multiple transcripts due to the presence of alternatively spliced transcripts, other reactions amplify several related gene family members, these reactions are typically identified because the gene name is followed by several numbers, indicating individual family members, for example, BAGE (1,2,3,4,5). The top QPCR primer is the 5' or forward primer; the bottom primer is the 3' or reverse primer.
